# Supplementary material for: An iron(iii) complex-based supramolecular organic framework (SOF) as a theranostic platformviamagnetic resonance imaging-guided chemotherapy
Source: Royal Society of Chemistry journal article supplement (doi:10.1039/d2tb02551e), 2023-01-01
Supplement: d2tb02551e1.pdf [file d2tb02551e1.pdf]

## Supplementary Information

### **An iron(III) complex-based supramolecular organic framework (SOF) as a theranostic platform via magnetic resonance imaging-guided chemotherapy**

Pengpeng Hu,<sup>a</sup> Hong Mo,<sup>\*a</sup> Saijie Song,<sup>\*a</sup> Jing Wu,<sup>b</sup> Jihui Li,<sup>c</sup> Jian Shen<sup>\*ad</sup>

<sup>a</sup> National and Local Joint Engineering Research Center of Biomedical Functional Materials, Jiangsu Engineering Research Center for Biomedical Function Materials, School of Chemistry and Materials Science, Nanjing Normal University, Nanjing 210023, China

<sup>b</sup> Nanjing Customs District Industrial Products Inspection Center, Nanjing 210019, China

<sup>c</sup> Shenyang Institute of Industrial Technology, Shenyang 110000, China

<sup>d</sup> Jiangsu Engineering Research Center of Interfacial Chemistry, Nanjing University, Nanjing, 210023, China

\*Authors to whom all correspondence should be addressed

E-mail Address: [07198@njnu.edu.cn](mailto:07198@njnu.edu.cn)

or [sjsong2014@sinano.ac.cn](mailto:sjsong2014@sinano.ac.cn)

or [jianshen\\_nj@163.com](mailto:jianshen_nj@163.com)

Tel: +86-25-83598031, Fax: +86-25-83716813

## 1. Crystallographic data for Fe(III)-SOF

**Table S1** Crystallographic data for Fe(III)-SOF

|                                     | this work                                 | previous work (ref. 1)                                      |
|-------------------------------------|-------------------------------------------|-------------------------------------------------------------|
| Moiety formula                      | $(C_{42}H_{30}N_6O_{12}Fe_2)(C_3H_7NO)_6$ | $(C_{42}H_{30}N_6O_{12}Fe_2)(C_3H_7NO)_7(C_4H_{10}O)_{0.5}$ |
| Crystal system                      | monoclinic                                | monoclinic                                                  |
| Space group                         | $C2/c$                                    | $C2/c$                                                      |
| $a / \text{\AA}$                    | 23.5899(9)                                | 23.682(3)                                                   |
| $b / \text{\AA}$                    | 23.4215(8)                                | 23.465(3)                                                   |
| $c / \text{\AA}$                    | 14.8124(6)                                | 14.912 (2)                                                  |
| $\beta / ^\circ$                    | 112.223(2)                                | 112.501(2)                                                  |
| $T / \text{K}$                      | 150                                       | 293                                                         |
| $V / \text{\AA}^3$                  | 7576.1(5)                                 | 7656.0(18)                                                  |
| $Z$                                 | 4                                         | 4                                                           |
| $D_c / \text{g}\cdot\text{cm}^{-3}$ | 1.216                                     | 1.276                                                       |
| $F(000)$                            | 2912                                      | 3092                                                        |
| $\mu / \text{mm}^{-1}$              | 3.654                                     | 0.453                                                       |
| Reflections collected               | 39812                                     | 18224                                                       |
| Independent reflections             | 7773                                      | 6590                                                        |
| $R_{\text{int}}$                    | 0.0619                                    | 0.0975                                                      |
| $R_1$                               | 0.080                                     | 0.074                                                       |
| $wR_2$                              | 0.218                                     | 0.127                                                       |

## 2. Powder X-ray diffraction (XRD) patterns of Fe(III)-SOF

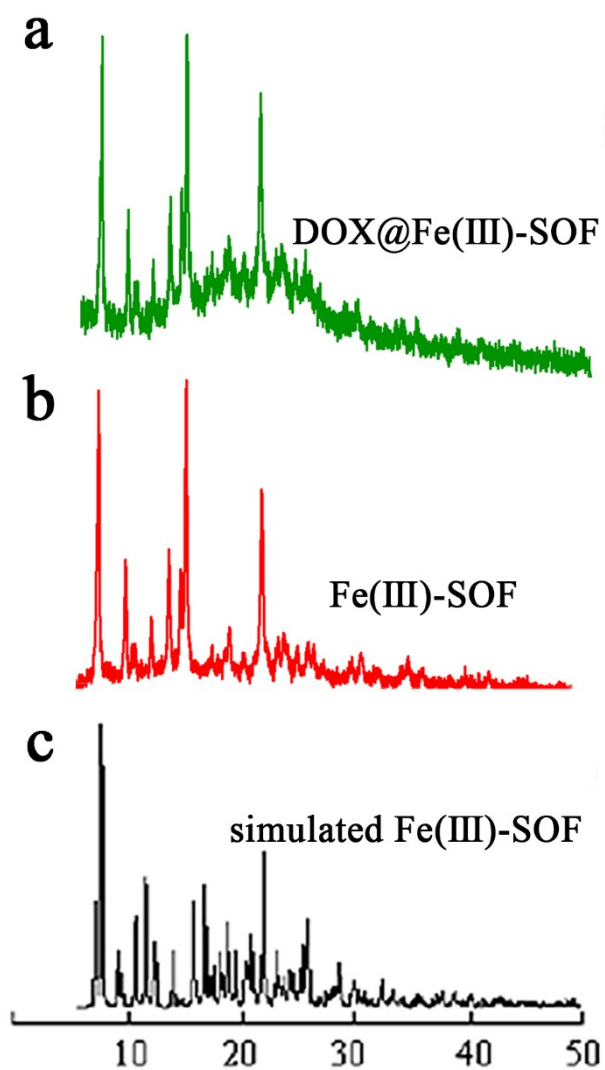

**Fig. S1.** Powder XRD patterns: (a) DOX@Fe(III)-SOF, (b) Fe(III)-SOF, (c) the pattern simulated from the single-crystal data.<sup>1</sup>

### 3. Fourier transform infrared (FTIR) spectra

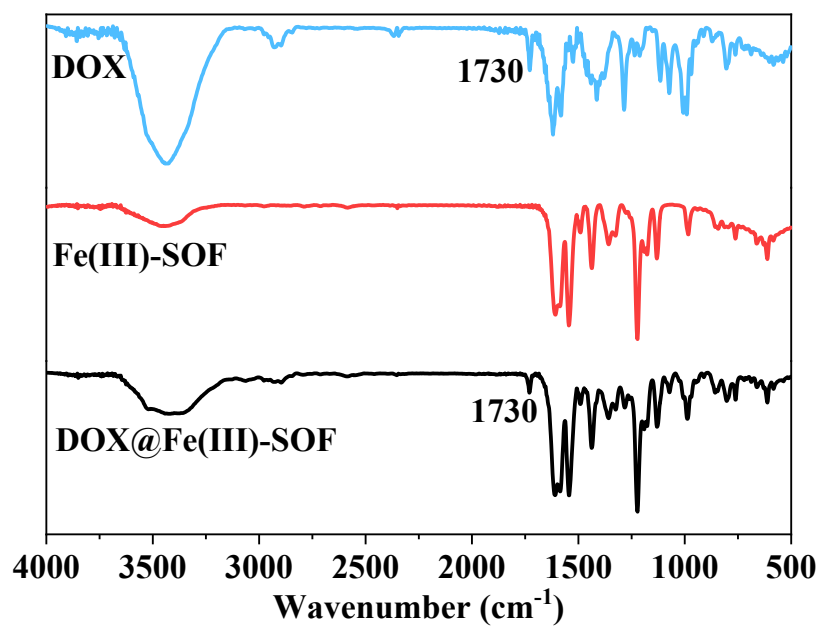

Fig. S2. FTIR spectra of DOX, Fe(III)-SOF and DOX@Fe(III)-SOF

### 4. Zeta potentials

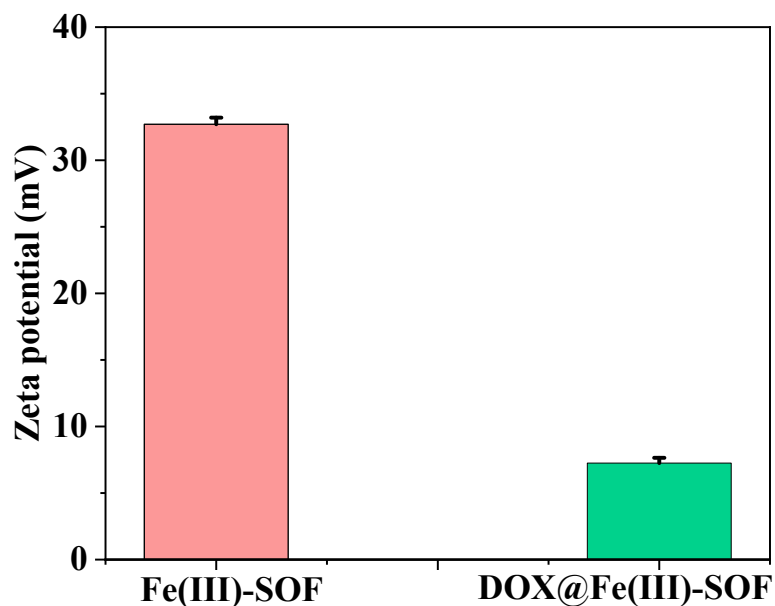

Fig. S3. The zeta potentials of Fe(III)-SOF and DOX@Fe(III)-SOF dispersed in water

## 5. The chemical and thermal stability of Fe(III)-SOF

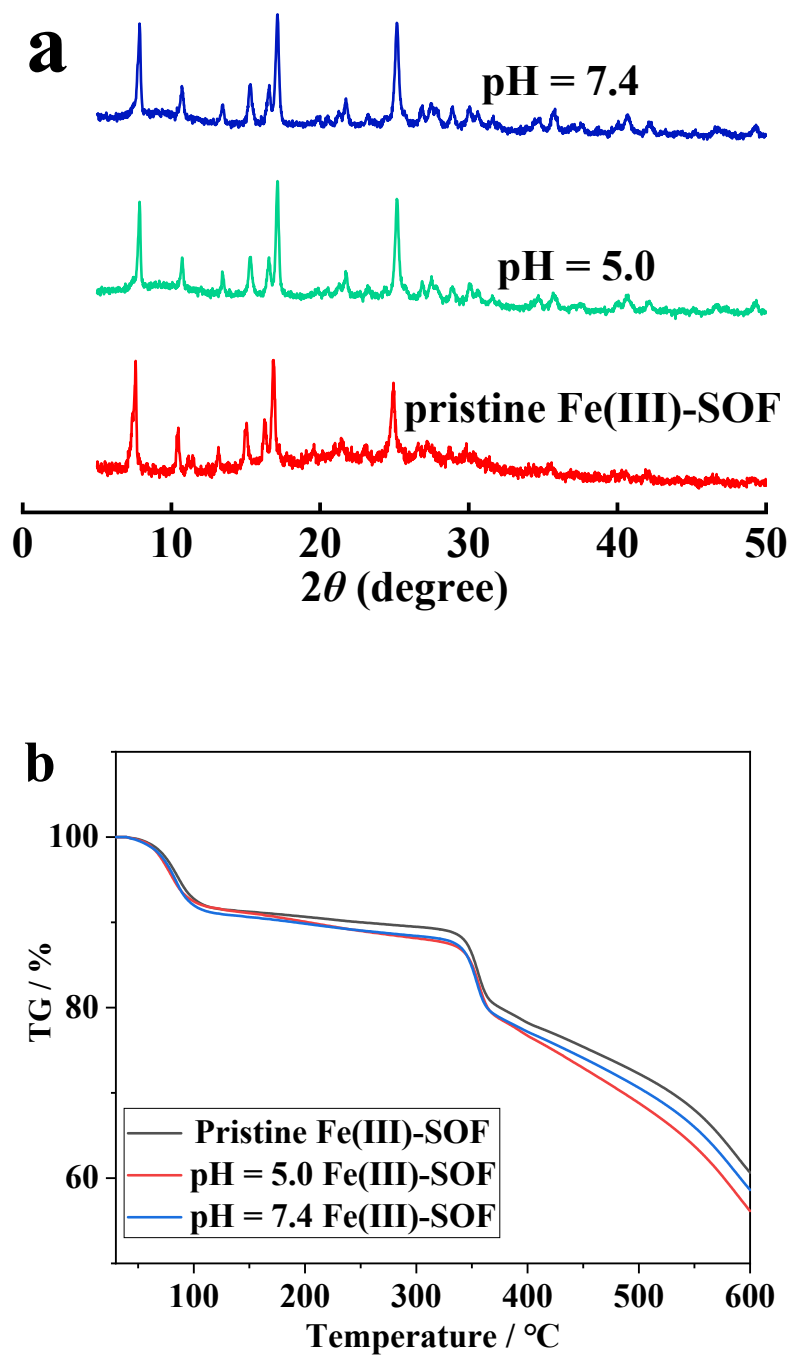

**Fig. S4.** (a) The powder XRD patterns and (b) the thermogravimetric analysis (TGA) of Fe(III)-SOF soaked in PBS (pH=7.4, 5.0) for 24 h

## 6. The UV-vis spectra and the standard curve of DOX for the loading content

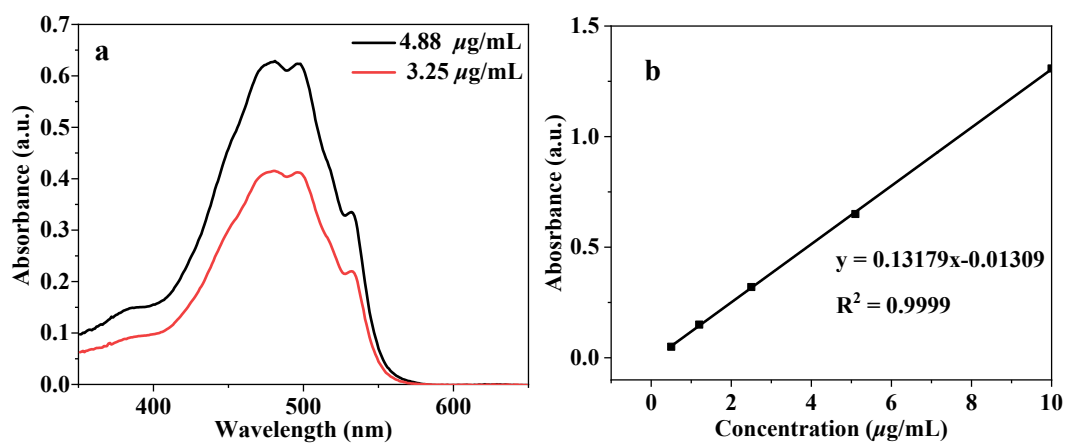

Fig. S5. (a) The UV-vis spectra of DOX, (b) the standard curve of DOX

## References

- 1 H. Mo, D. Guo, C. Y. Duan, Y. T. Li and Q. J. Meng, *J. Chem. Soc., Dalton Trans.*, 2002, 3422–3424.
